# Supplementary material for: Vendors' handling practices of edible long-horned grasshoppers (Ruspolia differens) products and implications on microbial safety
Source: PubMed Central journal article supplement (PMC11102984; doi:10.3389/fmicb.2024.1385433), 2024-05-06
Supplement: Data_Sheet_1.pdf [file Data_Sheet_1.pdf]

## Supplementary S1

# Food Safety Knowledge and Hygiene Practices Questionnaire

## General Information

Questionnaire no..... Vendor number.....Collector number..... Date.....  
Market name.....Town/City.....

## Section A: Socio-demographic Characteristics

1. Gender M [ ] F [ ]

2. Age 18-25 [ ] 26-25 [ ] 36-55 [ ] Above 55 [ ]

3. Highest level of education attained

No education [ ] Primary [ ] Secondary [ ] Tertiary [ ]

4. Marital Status

Never Married [ ] Married monogamous [ ] Married Polygamous [ ] Divorced/Separated [ ]

Widowed [ ]

5. Have you ever received any training on food safety, hygiene and sanitation?

Yes [ ] No [ ]

6. Length of time in the job/ business

Less than 1 year [ ] 1-5yrs [ ] 6-10yrs [ ] 10-15yrs [ ] 16-20yrs [ ]

above 20yrs [ ]

## Section B: Food safety Knowledge

### I. Grasshopper processing

1. What type of vendor are you?

Market vendor [ ]

Street Vendor [ ]

2. Where do you prepare your *nsebene* from

Market stall [ ] Home [ ] Other (Specify).....

3. What type of processed grasshopper do you specialize in

Fresh [ ] Boiled [ ] Fried without oil [ ] Deep fried [ ]

4. What do you consider when buying *nsebene* from the collectors

Freshness [ ] Price [ ] Type of packaging [ ] Cleanliness of collector/Transport Vehicle [ ]

5. Do you think *nsebene* is clean when you receive it from the collector or does it need sorting and cleaning

Clean [ ] Requires Sorting/ Cleaning [ ]

6. Which parts are removed during the cleaning/ sorting process

Wing [ ] Hind legs [ ] Others (specify).....

7. Why is it important to remove these parts/ Why are they not eaten?

Can cause injury to consumer [ ] Not liked by consumer [ ] Other (specify).....

8. Are the insects washed with water before cooking

Yes [ ] No [ ]

9. How many times do the insects need to be washed in order to be completely clean

Once [ ] Twice [ ] repeatedly until water comes out clear [ ]

10. What is your source of water supply?

Public tap [ ] Bring from home [ ] Buy from water vendors [ ] Private property i.e. Church [ ]

11. During cooking, how long are the grasshoppers,

- a) Boiled .....
- b) Deep-fried.....
- c) Pan-fried without oil.....

12. How often do you change the oil

Daily [ ] Weekly [ ] Monthly [ ] other (specify).....

13. How long can cooked *nsebene* stay without getting spoilt without refrigeration

Less than 24hrs [ ] 24hrs [ ] 24-36hrs [ ] 36-48hrs [ ] More than 48 hrs [ ]

14. How long does the fresh *nsebene* last without getting spoilt without refrigeration

Less than 24hrs [ ] 24hrs [ ] 24-36hrs [ ] 36-48hrs [ ] More than 48 hrs [ ]

15. How is the food stored while vending

Open air [ ] In covered containers [ ] Cooler box/refrigerator [ ]

16. Is there a chance of mixing fresh and processed grasshoppers

Yes [ ] No [ ]

17. Type of surface used by the vendor for preparing food

Wood [ ] Cardboard [ ] Aluminum [ ] Concrete [ ] Other (specify).....

18. Type of packaging used to sell *nsebene*

Plastic paper [ ] Newspaper wrapping [ ] Kraft Paper(brown) [ ] Other (Specify).....

19. How do you handle leftover *nsebene*

Throw away [ ] Store for selling next day [ ] Take home to eat [ ] No leftovers [ ]

20. How are leftovers stored

Room temperature [ ] Refrigerator [ ]



Running tap water within the facility [ ]      Water in a container within facility [ ]

Water in container at the vendors selling point [ ]

Is there soap where they wash their hands

Yes [ ]

No [ ]

## II. Personal Hygiene

The interviewer will tick what they observe in the checklist below

Use a tick ✓ for YES and an X for No

|                                                                 |  |
|-----------------------------------------------------------------|--|
| Talking while working with food                                 |  |
| Handling food and money without washing hands in between        |  |
| Dry sweat in a way that can contaminate food                    |  |
| Handles <i>nseene</i> without gloves / any hand covering        |  |
| Vendor is wearing a clean apron or overcoat                     |  |
| Vendor has short clean finger nails                             |  |
| Smoking while handling the insects                              |  |
| Vendor's hands are clean                                        |  |
| He/she is not wearing any jewelry                               |  |
| His/her hair is covered                                         |  |
| Blows air into polythene bag before use                         |  |
| Vendor is coughing/sneezing over food                           |  |
| He/she is itching hair/body while working with food             |  |
| Vendor looks like he/she is suffering from a cold while working |  |
